# Supplementary material for: Simultaneous Irradiation with UV-A, -B, and -C Lights Promotes Effective Decontamination of Planktonic and Sessile Bacteria: A Pilot Study
Source: MDPI journal article supplement (doi:10.3390/ijms241612951), 2023-08-18
Supplement: s1 [file s1]

# Simultaneous Irradiation with UV-A, -B, and -C Lights Promotes Effective Decontamination of Planktonic and Sessile Bacteria: A Pilot Study

Andrea Bosso <sup>1,\*</sup>, Francesca Tortora <sup>1</sup>, Rosanna Culurciello <sup>1</sup>, Ilaria Di Nardo <sup>1</sup>, Valeria Pistorio <sup>2</sup>, Federica Carraturo <sup>1,3</sup>, Andrea Colecchia <sup>4</sup>, Rocco Di Girolamo <sup>5</sup>, Valeria Cafaro <sup>1</sup>, Eugenio Notomista <sup>1</sup>, Raffaele Ingenito <sup>6</sup> and Elio Pizzo <sup>1,7,\*</sup>

<sup>1</sup> Department of Biology, University of Naples Federico II, 80126 Naples, Italy

<sup>2</sup> Centre de Recherche Saint-Antoine (CRSA), Sorbonne University, Inserm, 75012 Paris, France

<sup>3</sup> Hygiene Laboratory, Centro Servizi Metrologici e Tecnologici Avanzati (CeSMA), University of Naples Federico II, Corso Nicolangelo Protopisani, 80146 Naples, Italy

<sup>4</sup> Physics Department “Ettore Pancini”, University of Naples Federico II, 80126 Naples, Italy

<sup>5</sup> Department of Chemical Sciences, University of Naples Federico II, 80126 Naples, Italy

<sup>6</sup> Naturamla S.R.L., 00195 Rome, Italy

<sup>7</sup> Centro Servizi Metrologici e Tecnologici Avanzati (CeSMA), University of Naples Federico II, 80126 Naples, Italy

\* Correspondence: **Corresponding Authors:** andrea.bosso@unina.it, +39 081679129, elipizzo@unina.it +39 081679151

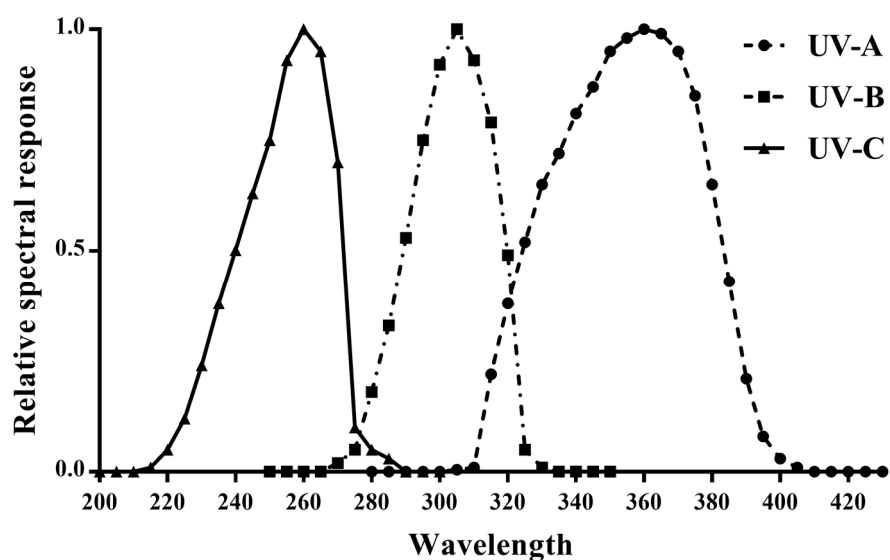

Figure S1. Relative spectral response of the device equipped with three UV channels.

Table S1. Technical data of UV-ABC lamp.

| TECHNICAL DATA    | UVC + UVB + UVA    |
|-------------------|--------------------|
| Power <b>UVC</b>  | 2x 120 W           |
| Power <b>UVB</b>  | 60 W               |
| Power <b>UVA</b>  | 60 W               |
| Power <b>LED</b>  | 45 W               |
| Color Temperature | 4000 K             |
| Lumen             | 6720 (140 lm/W)    |
| Dimensions        | 1200 x 170 x 55 mm |
| Weigth            | 4,0 Kg             |

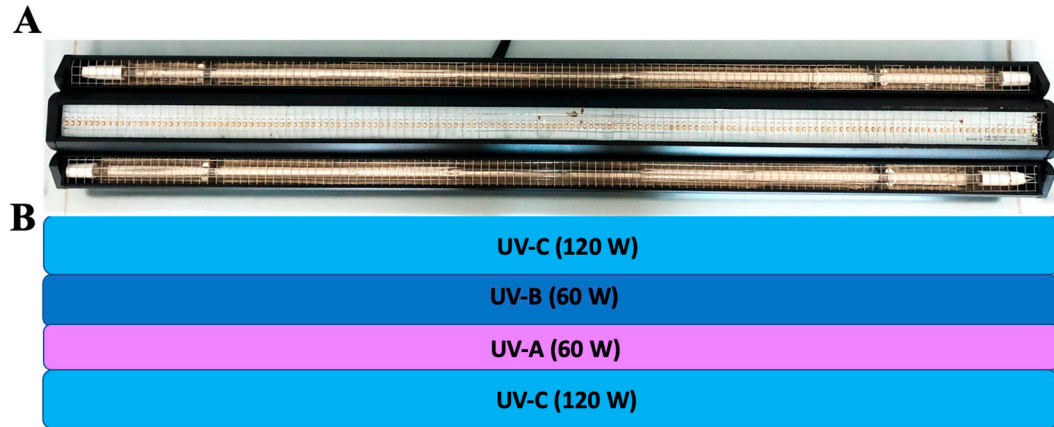

**Figure S2. (A) Picture of the UV-lamp described in the text, (B) its scheme of light sources and power.**

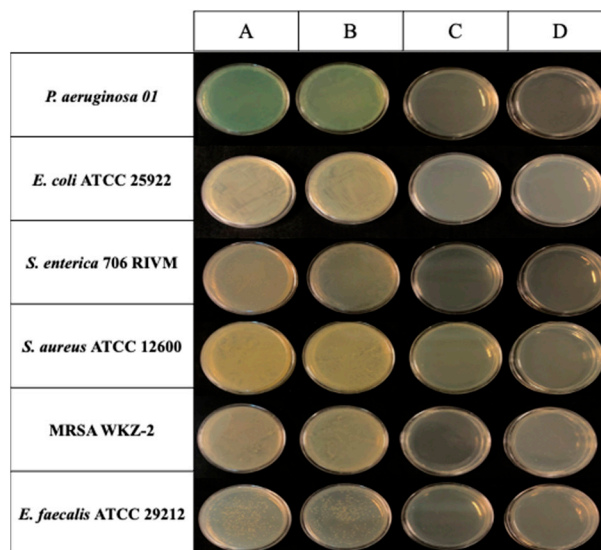

**Figure S3. Analysis of UV treatment on solid medium before and after seeding of bacteria.**

(A) Control: bacteria were seeded on solid media and grown at 37°C for 16 hours. (B) the solid medium was pretreated with UV light for 5 minutes and then the bacteria were plated and let grow. (C) The solid medium was seeded with bacteria and then treated with a UV lamp for 5 minutes. (D) The solid medium was pretreated with UV for 5 minutes in the absence of bacteria, then the bacteria were seeded, and the plate was again treated with UV for 5 minutes.

Table S2. Irradiance and Energy dose of UV-C lamp measured from a distance of 60 cm.

|                | UV-C (240 W)                     |                                   |
|----------------|----------------------------------|-----------------------------------|
| Time (minutes) | Irradiance (mW/cm <sup>2</sup> ) | Energy Dose (mJ/cm <sup>2</sup> ) |
| 0              | 0,2                              | 12                                |
| 5              | 0,371                            | 111,3                             |
| 30             | 0,189                            | 340,2                             |
| 60             | 0,18                             | 648                               |
| 180            | 0,16                             | 1728                              |

Table S3. Technical data of UV-C lamp.

| TECHNICAL DATA    | HF -UVC            |
|-------------------|--------------------|
| Power UVC         | 240 W              |
| Power LED         | 45 W               |
| Color Temperature | 4000 K             |
| Lumen             | 6720 (140 lm/W)    |
| Dimensions        | 1200 x 170 x 55 mm |
| Weigth            | 4,0 Kg             |

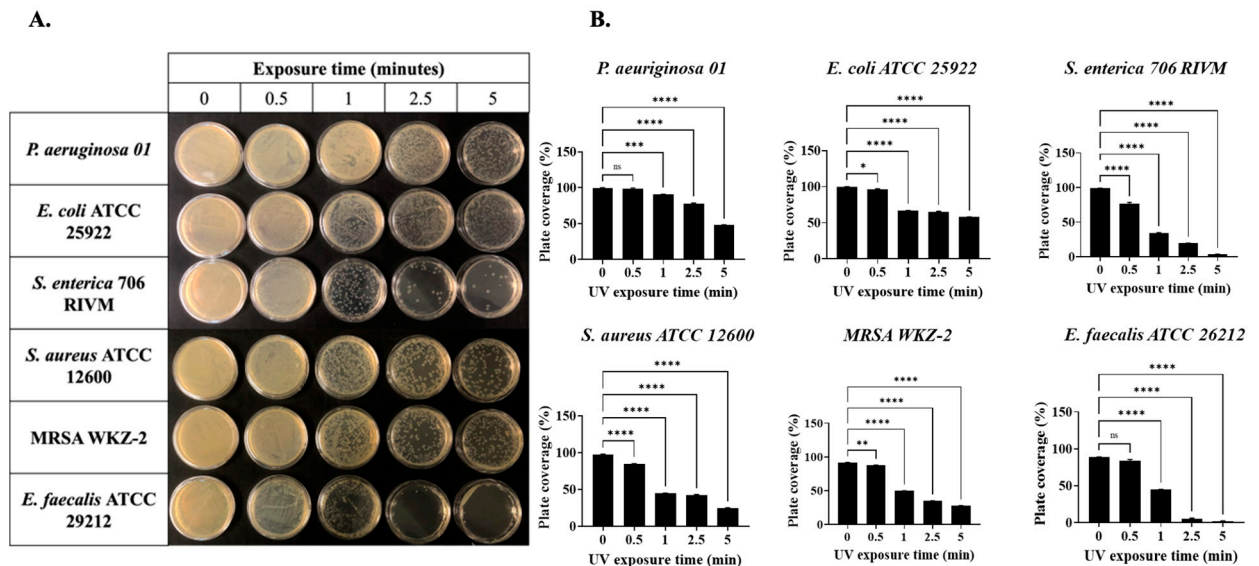

**Table S4.** Results of the on-field tests for the evaluation of the microbicidal effect of 5, 60 and 180 minutes of UV exposures performed on a PVC surface after natural contamination.

| UV lamp tests performed on naturally contaminated PVC surface         |                      |                 |                  |                   |
|-----------------------------------------------------------------------|----------------------|-----------------|------------------|-------------------|
| Analyzed parameter<br>(Results expressed in CFU/100 cm <sup>2</sup> ) | Before the treatment | 5 min treatment | 60 min treatment | 180 min treatment |
| Total Bacterial Count at 22°C                                         | 132                  | 20              | 8                | 4                 |
| Total Bacterial Count at 37°C                                         | 32                   | 4               | 0                | 0                 |
| Molds and yeasts                                                      | 108                  | 16              | 12               | 8                 |

| Microbial die-off rates following the treatment with UV lamp on naturally contaminated PVC surface |              |            |             |
|----------------------------------------------------------------------------------------------------|--------------|------------|-------------|
| Analyzed parameter<br>(Results expressed in CFU/100 cm <sup>2</sup> )                              | Die-off rate |            |             |
|                                                                                                    | 5 minutes    | 60 minutes | 180 minutes |
| Total Bacterial Count at 22°C                                                                      | 84.85        | 93.94      | 96.97       |
| Total Bacterial Count at 37°C                                                                      | 87.50        | 100.00     | 100.00      |
| Molds and yeasts                                                                                   | 85.19        | 88.89      | 92,59       |

**Table S5.** Results of the on-field tests for the evaluation of the microbicidal effect of 5, 60 and 180 minutes of UV exposures performed on rough ceramic tile after natural contamination.

| UV lamp tests performed on naturally contaminated rough ceramic tile  |                      |                 |                  |                   |
|-----------------------------------------------------------------------|----------------------|-----------------|------------------|-------------------|
| Analyzed parameter<br>(Results expressed in UFC/100 cm <sup>2</sup> ) | Before the treatment | 5 min treatment | 60 min treatment | 180 min treatment |
| Total Bacterial Count at 22°C                                         | 192                  | 28              | 8                | 4                 |
| Total Bacterial Count at 37°C                                         | 128                  | 8               | 4                | 2                 |
| Molds and yeasts                                                      | 48                   | 8               | 0                | 0                 |

| Microbial die-off rates following the treatment with UV lamp on naturally contaminated rough ceramic tile |              |            |             |
|-----------------------------------------------------------------------------------------------------------|--------------|------------|-------------|
| Analyzed parameter<br>(Results expressed in UFC/100 cm <sup>2</sup> )                                     | Die-off rate |            |             |
|                                                                                                           | 5 minutes    | 60 minutes | 180 minutes |
| Total Bacterial Count at 22°C                                                                             | 85.42        | 95.83      | 97.92       |
| Total Bacterial Count at 37°C                                                                             | 93.75        | 96.88      | 98.44       |
| Molds and yeasts                                                                                          | 83.33        | 100.00     | 100.00      |
